# Supplementary material for: Low carbon hydrogen production from a waste-based biorefinery system and environmental sustainability assessment
Source: Royal Society of Chemistry journal article supplement (doi:10.1039/d0gc03063e), 2020-11-18
Supplement: d0gc03063e1.pdf [file d0gc03063e1.pdf]

## Low Carbon Hydrogen production from waste based Biorefinery System and Environmental Sustainability Assessment †

Omprakash Sarkar<sup>a,b</sup>, Ranaprathap Katakajwala<sup>a,b</sup>, S. Venkata Mohan<sup>a,b\*</sup>

<sup>a</sup>Bioengineering and Environmental Sciences Lab, Department of Energy and Environmental Engineering (DEEE), CSIR-Indian Institute of Chemical Technology (CSIR-IICT), Hyderabad-500007, India.

<sup>b</sup>Academy of Scientific and Innovative Research (AcSIR), Ghaziabad-201002, India.

\*E-mail: svmohan@iict.res.in; vmohan\_s@yahoo.com; Tel: 0091-40-27191765

**S Table 1: Key categories required for addressing data quality in life cycle assessment**

| Category                       | Corresponding Information   |
|--------------------------------|-----------------------------|
| Time related coverage          | Round the calendar          |
| Geographical coverage          | Globally applicable         |
| Technology coverage            | Pilot scale study           |
| Precision                      | Variance less than 5%       |
| Completeness                   | 96±1%                       |
| Representativeness             | Accuracy 96±1%              |
| Consistency                    | 96±1%                       |
| Reproducibility                | 96±1%                       |
| Sources of the data            | Ecoinvent v3.4 database     |
| Uncertainty of the information | Acceptable (less than 0.5%) |

**S Table 2: Uncertainty analysis of standalone and integrated process to correlate the actual and expected results by quantifying the variability output with respect to the input**

| <b>Impact category</b>                          | <b>Uncertainty value</b>  |                            |
|-------------------------------------------------|---------------------------|----------------------------|
|                                                 | <b>Standalone process</b> | <b>Integrated approach</b> |
| <b>Aquatic acidification</b>                    | 0.02                      | 0.02                       |
| <b>Aquatic ecotoxicity</b>                      | 0.32                      | 0.31                       |
| <b>Aquatic eutrophication</b>                   | 0.71                      | 0.67                       |
| <b>Carcinogens</b>                              | 0.51                      | 0.46                       |
| <b>Global warming</b>                           | 0.01                      | 0.01                       |
| <b>Ionizing radiation</b>                       | 1.08                      | 0.90                       |
| <b>Land occupation</b>                          | 0.28                      | 0.26                       |
| <b>Mineral extraction</b>                       | 0.28                      | 0.79                       |
| <b>Non-carcinogens</b>                          | 1.05                      | 0.96                       |
| <b>Non-renewable energy</b>                     | 0.01                      | 0.01                       |
| <b>Ozone layer depletion</b>                    | 0.19                      | 0.19                       |
| <b>Respiratory inorganics</b>                   | 0.08                      | 0.09                       |
| <b>Respiratory organics</b>                     | 0.02                      | 0.03                       |
| <b>Terrestrial acidification/nuttrification</b> | 0.01                      | 0.01                       |
| <b>Terrestrial ecotoxicity</b>                  | 0.29                      | 0.30                       |
